# Supplementary material
Source: MDPI journal article supplement (https://www.mdpi.com/2311-5637/8/12/734)
Supplement: s1 [file s1]

# Life Cycle Assessment of Bioethanol Production: A Case Study from Poplar Biomass Growth in the U.S. Pacific Northwest

## Supplementary Materials

Rodrigo Morales-Vera <sup>1,2,\*</sup>, Leonardo Vásquez-Ibarra <sup>3</sup>, Felipe Scott <sup>4</sup>, Maureen Puettmann <sup>5</sup> and Richard Gustafson <sup>6</sup>

<sup>1</sup> School of Agricultural and Forest Sciences, Catholic University of Maule, Center of Biotechnology of Natural Resources (CENBIO), Talca 3480112, Chile

<sup>2</sup> Facultad de Ingeniería, Ciencias y Tecnología, Universidad Bernardo O'Higgins, Santiago 8370993, Chile

<sup>3</sup> Doctoral Program in Engineering Systems, Faculty of Engineering, Campus Curicó, Universidad de Talca, Camino a Los Niches, km 1, Curicó 3340000, Chile

<sup>4</sup> Green Technology Research Group, Facultad de Ingeniería y Ciencias Aplicadas, Universidad de Los Andes, Santiago 7620001, Chile

<sup>5</sup> CORRIM-Consortium for Research on Renewable Industrial Materials, Corvallis, OR 97339, USA

<sup>6</sup> School of Environmental and Forest Sciences, University of Washington, P.O. Box 352100, Seattle, WA 98195-2100, USA

\* Correspondence: rmorales@ucm.cl

Table S1. Life cycle inventory of the feedstock and harvesting production

| Year                                              | 1         | 2     | 3         | 4       | 5       | 6         | 7       |
|---------------------------------------------------|-----------|-------|-----------|---------|---------|-----------|---------|
| Forest Annual Carbon Uptake (tonnes carbon/ha/yr) | 0         | 4.2   | 4.4       | 7.9     | 8.3     | 8.3       | 7.9     |
| Bioenergy Removals (dry ton per ha)               |           |       |           |         |         |           |         |
| Dry Tons of Dedicated Harvest                     | 0.00      | 0.00  | 17.73     | 0.00    | 0.00    | 50.76     | 0.00    |
| Hardwoods Uncollected Biomass (dry ton per ha)    | 0.00      | 0.00  | 1.30      | 0.00    | 0.00    | 3.74      | 0.00    |
| Energy Use (per ha)                               |           |       |           |         |         |           |         |
| BTU of Diesel                                     | 5,035,762 | 0     | 6,313,400 | 168,128 | 299,268 | 9,923,673 | 168,128 |
| BTU of Lubricant                                  | 99,385    | 8,609 | 111,543   | 1,069   | 2,911   | 175,328   | 2,970   |
| Pesticide Use (per ha)                            |           |       |           |         |         |           |         |
| Grams Herbicide                                   | 9,492     | 2,526 | 1,894     | 6,959   | 3,480   | 3,473     | 6,959   |
| Grams Insecticide                                 | 30        | 0     | 0         | 0       | 0       | 0         | 0       |

  

| Year                                              | 8       | 9         | 10      | 11      | 12        | 13      | 14      |
|---------------------------------------------------|---------|-----------|---------|---------|-----------|---------|---------|
| Forest Annual Carbon Uptake (tonnes carbon/ha/yr) | 8.3     | 8.3       | 7.9     | 8.3     | 8.3       | 7.9     | 8.3     |
| Bioenergy Removals (dry ton per ha)               |         |           |         |         |           |         |         |
| Dry Tons of Dedicated Harvest                     | 0.00    | 50.76     | 0.00    | 0.00    | 50.76     | 0.00    | 0.00    |
| Hardwoods Uncollected Biomass (dry ton per ha)    | 0.00    | 3.74      | 0.00    | 0.00    | 3.74      | 0.00    | 0.00    |
| Energy Use (per ha)                               |         |           |         |         |           |         |         |
| BTU of Diesel                                     | 299,268 | 9,923,673 | 168,128 | 299,268 | 9,923,673 | 168,128 | 299,268 |
| BTU of Lubricant                                  | 5,287   | 175,328   | 2,970   | 5,287   | 175,328   | 2,970   | 5,287   |
| Pesticide Use (per ha)                            |         |           |         |         |           |         |         |
| Grams Herbicide                                   | 3,480   | 3,473     | 6,959   | 3,480   | 3,473     | 6,959   | 3,480   |
| Grams Insecticide                                 | 0       | 0         | 0       | 0       | 0         | 0       | 0       |

| <b>Year</b>                                       | <b>15</b> | <b>16</b> | <b>17</b> | <b>18</b> | <b>19</b> | <b>20</b> | <b>21</b>  |
|---------------------------------------------------|-----------|-----------|-----------|-----------|-----------|-----------|------------|
| Forest Annual Carbon Uptake (tonnes carbon/ha/yr) | 8.3       | 7.9       | 8.3       | 8.3       | 7.9       | 8.3       | 8.3        |
| Bioenergy Removals (dry ton per ha)               |           |           |           |           |           |           |            |
| Dry Tons of Dedicated Harvest                     | 50.76     | 0.00      | 0.00      | 50.76     | 0.00      | 0.00      | 50.76      |
| Hardwoods Uncollected Biomass (dry ton per ha)    | 3.74      | 0.00      | 0.00      | 3.74      | 0.00      | 0.00      | 3.74       |
| Energy Use (per ha)                               |           |           |           |           |           |           |            |
| BTU of Diesel                                     | 9,923,673 | 168,128   | 299,268   | 9,923,673 | 168,128   | 299,268   | 11,618,339 |
| BTU of Lubricant                                  | 175,328   | 2,970     | 5,287     | 175,328   | 2,970     | 5,287     | 205,270    |
| Pesticide Use (per ha)                            |           |           |           |           |           |           |            |
| Grams Herbicide                                   | 3,473     | 6,959     | 3,480     | 3,473     | 6,959     | 3,480     | 16,100     |
| Grams Insecticide                                 | 0         | 0         | 0         | 0         | 0         | 0         | 0          |
